# Supplementary material
Source: PubMed Central journal article supplement (PMC10105036)
Supplement: mmc1.pdf [file mmc1.pdf]

## **Supplementary Material**

### **Supplementary Methods**

#### ***Study design and patients***

All patients, who underwent native kidney biopsy and were diagnosed with primary or secondary membranous nephropathy (MN) from 2005 to 2018 at Jikei University Hospital (Tokyo, Japan), Jikei Kashiwa Hospital (Chiba, Japan), and Jikei Daisan Hospital (Tokyo, Japan), were included in this study.

Patients with rheumatoid arthritis (RA) were identified by reviewing the medical records of all enrolled MN patients. RA diagnosis was made according to the 2010 American College of Rheumatology (ACR)/ European Alliance of Associations for Rheumatology (EULAR) classification criteria. No patients fulfilled the following classification criteria for systemic lupus erythematosus (SLE): the 1997 ACR criteria, the 2012 Systemic Lupus International Collaborating Clinics (SLICC) classification criteria, or the 2019 EULAR/ACR criteria.

This study was approved by the ethics review board of Jikei University School of Medicine (33-386 [11010]) and was conducted in accordance with the Declaration of Helsinki. Since this was a retrospective study, information about the research plan was

posted, patients were offered the opportunity to refuse participation, and individual informed consent was not required.

### ***Clinical measurements***

Clinical characteristics, including age, sex, body mass index (BMI), medical history, medications, clinical details of RA (diagnosis date, diagnosis basis, involved joints, treatments, interval to nephropathy onset, drug therapy duration), MN treatment, and MN outcome were obtained from the medical records of patients. Laboratory data, including serum albumin level, serum creatinine (Cr) level, 24-hour urine protein quantitation at kidney biopsy, rheumatoid factor, C-reactive protein (CRP) level, erythrocyte sedimentation rate (ESR), anti-citrullinated protein/peptide antibody (ACPA) level, matrix metalloproteinases 3 (MMP-3) level, and anti-nuclear antibody (ANA) level, were also collected. Estimated glomerular filtration rate (eGFR) was defined by the following formula for Japanese subjects:  $eGFR \text{ (mL/min per } 1.73 \text{ m}^2) = 194 \times Cr^{-1.094} \times age^{-0.287} (\times 0.739 \text{ for women})$ . BMI was calculated as the body weight divided by the square of height.

### ***Histopathological findings from kidney biopsy***

Paraffin-embedded kidney biopsy specimens from all enrolled MN patients were subjected to immunostaining for NELL1. Briefly, 3- $\mu$ m thick sections were stained with rabbit polyclonal anti-NELL1 primary antibody (1:100 dilution; HPA012657, Sigma-Aldrich) after heat-induced antigen retrieval. NELL1 positivity was confirmed by frozen tissue staining if available. Tissue samples from all enrolled MN cases were stained for IgG, IgA, IgM, C3, and C1q. All NELL1-positive cases and NELL1-negative cases with RA were stained for phospholipase A2 receptor (PLA2R) (1:100 dilution; HPA051535, Sigma-Aldrich). Electron microscopy findings were evaluated for the presence of electron-dense deposits. MN stage was determined according to the Ehrenreich-Churg classification. Specimens containing five or more glomeruli were eligible for NELL1-staining evaluation. MN was classified as segmental if subepithelial deposits were present in at least 25% but no more than 75% of the total glomerular capillaries by light microscopy, immunofluorescence, or electron microscopy.

## Supplementary References

- S1. Wang G, Sun L, Dong H, et al. Neural epidermal growth factor-like 1 protein-positive membranous nephropathy in Chinese patients. *Clin J Am Soc Nephrol.* 2021;16:727–735. <https://doi.org/10.2215/CJN.11860720>
- S2. Zarza LP, Sanchez EN, Acin PA, et al. Membranous glomerulonephritis in rheumatoid arthritis unrelated to gold, d-penicillamine or other connective tissue disease. *Clin Rheumatol.* 1996;15:385–388. <https://doi.org/10.1007/BF02230363>
- S3. Adu D, Berisa F, Howie AJ, et al. Glomerulonephritis in rheumatoid arthritis. *Br J Rheumatol.* 1993;32:1008–1011. <https://doi.org/10.1093/rheumatology/32.11.1008>
- S4. Samuels B, Lee JC, Engleman EP, et al. Membranous nephropathy in patients with rheumatoid arthritis: relationship to gold therapy. *Medicine.* 1978;57:319–327. <http://doi.org/10.1097/00005792-197807000-00003>
- S5. Helin HJ, Korpela MM, Mustonen JT, et al. Renal biopsy findings and clinicopathologic correlations in rheumatoid arthritis. *Arthritis Rheum.* 1995;38:242–247. <https://doi.org/10.1002/art.1780380213>
- S6. Ting K, Vastardis H, Mulliken JB, et al. Human NELL-1 expressed in unilateral coronal synostosis. *J Bone Miner Res.* 1999;14:80–89. <https://doi.org/10.1359/jbmr.1999.14.1.80>
- S7. Li C, Zheng Z, Ha P, et al. Neural EGFL like 1 as a potential pro-chondrogenic,

anti-inflammatory dual-functional disease-modifying osteoarthritis drug.

*Biomaterials*. 2020;226:119541. <https://doi.org/10.1016/j.biomaterials.2019.119541>

S8. James AW, Shen J, Zhang X, et al. NELL-1 in the treatment of osteoporotic bone

loss. *Nat Commun*. 2015;6:7362. <https://doi.org/10.1038/ncomms8362>

S9. Yoshida A, Morozumi K, Suganuma T, et al. Clinicopathological findings of

bucillamine-induced nephrotic syndrome in patients with rheumatoid arthritis. *Am J*

*Nephrol*. 1991;11:284–288.

S10. Kikuchi M, Saeki T, Ito S, et al. Clinicopathological evaluation and treatment of

bucillamine induced membranous nephropathy. *Ryumachi*. 1993;33:215–222.

S11. Isozaki T, Kimura M, Ikegaya N, et al. Bucillamine (a new therapeutic agent for

rheumatoid arthritis) induced nephrotic syndrome: a report of two cases and review

of the literature. *Clin Investig*. 1992;70:1036–1042.

<https://doi.org/10.1007/BF00180315>

S12. Obayashi M, Uzu T, Harada T, et al. Clinical course of bucillamine-induced

nephropathy in patients with rheumatoid arthritis. *Clin Exp Nephrol*. 2003;7:275–

278. <https://doi.org/10.1007/s10157-003-0252-0>

S13. Hoshino J, Ubara Y, Hara S, et al. Outcome and treatment of bucillamine-induced

nephropathy. *Nephron Clin Pract*. 2006;104:c15–c19.

<https://doi.org/10.1159/000093254>

S14. Nagahama K, Matsushita H, Hara M, et al. Bucillamine induces membranous glomerulonephritis. *Am J Kidney Dis*. 2002;39:706–712.

<https://doi.org/10.1053/ajkd.2002.31987>

S15. den Broeder AA, Assmann KJM, van Riel PLCM, et al. Nephrotic syndrome as a complication of anti-TNFalpha in a patient with rheumatoid arthritis. *Neth J Med*. 2003;61:137–141.

S16. Iida A, Wada Y, Hayashi J, et al. Membranous nephropathy caused by rheumatoid arthritis. *CEN Case Rep*. 2019;8:233–238. [https://doi.org/10.1007/s13730-019-](https://doi.org/10.1007/s13730-019-00399-z)

[00399-z](https://doi.org/10.1007/s13730-019-00399-z)

S17. Wooley PH, Griffin J, Panayi GS, et al. HLA-DR antigens and toxic reaction to sodium aurothiomalate and d-penicillamine in patients with rheumatoid arthritis. *N Engl J Med*. 1980;303:300–302. <https://doi.org/10.1056/NEJM198008073030602>

S18. Stein HB, Schroeder ML, Dillon AM. Penicillamine-induced proteinuria: risk factors. *Semin Arthritis Rheum*. 1986;15:282–287. [https://doi.org/10.1016/0049-](https://doi.org/10.1016/0049-0172(86)90023-5)

[0172\(86\)90023-5](https://doi.org/10.1016/0049-0172(86)90023-5)

S19. Speerstra F, Reekers P, van de Putte LB, et al. HLA-DR antigens and proteinuria induced by aurothioglucose and d-penicillamine in patients with rheumatoid

arthritis. *J Rheumatol*. 1983;10:948–953.

S20. Panayi GS, Wooley P, Batchelor JR. Genetic basis of rheumatoid disease: HLA antigens, disease manifestations, and toxic reactions to drugs. *Br Med J*. 1978;2:1326–1328. <https://doi.org/10.1136/bmj.2.6148.1326>

S21. Emery P, Panayi GS, Huston G, et al. D-penicillamine induced toxicity in rheumatoid arthritis: the role of sulphoxidation status and HLA-DR3. *J Rheumatol*. 1984;11:626–632.

S22. Matsuo S, Imai E, Horio M, et al. Revised equations for estimated GFR from serum creatinine in Japan. *Am J Kidney Dis*. 2009;53:982–992. <https://doi.org/10.1053/j.ajkd.2008.12.034>

**Supplementary Table S1.** Comparison of clinical characteristics at the time of diagnostic kidney biopsy and histopathological findings between NELL1-positive and NELL1-negative cases suspected with bucillamine-induced MN.

|          |      | Clinical characteristics at the time of kidney biopsy |     |                          |                        |                                    |              |                  |                                                      | Kidney biopsy findings |     |     |     |     |                          |                         |
|----------|------|-------------------------------------------------------|-----|--------------------------|------------------------|------------------------------------|--------------|------------------|------------------------------------------------------|------------------------|-----|-----|-----|-----|--------------------------|-------------------------|
| NELL1    | Case | Age (years)                                           | Sex | BMI (kg/m <sup>2</sup> ) | Duration of RA (years) | eGFR (ml/min/1.73 m <sup>2</sup> ) | UPCR (g/gCr) | Treatment for RA | Interval from BUC initiation to proteinuria (months) | IgG                    | IgA | IgM | C3  | C1q | Distribution of deposits | Ehrendreich-Churg Stage |
| Positive | 1    | 61                                                    | F   | 18                       | 4                      | 40                                 | 1.4          | PSL, BUC         | 3                                                    | (+)                    | (-) | (+) | (-) | (+) | Seg                      | III                     |
|          | 2    | 54                                                    | M   | 23                       | 1                      | 66                                 | 3.4          | BUC              | 6                                                    | (+)                    | (-) | (+) | (-) | (+) | Diff                     | I                       |
|          | 4    | 81                                                    | M   | 22                       | 0.4                    | 47                                 | 4.6          | BUC, mPSL        | 3                                                    | (+)                    | (-) | (-) | (-) | (+) | Seg                      | I                       |
| Negative | 5    | 58                                                    | F   | 19                       | 10                     | 95                                 | 3.7          | BUC              | 57                                                   | (+)                    | (-) | (+) | (-) | (+) | Diff                     | I                       |
|          | 6    | 53                                                    | F   | 17                       | 33                     | 86                                 | 0.6          | BUC              | 1                                                    | (+)                    | (-) | (+) | (-) | (+) | Diff                     | I                       |
|          | 7    | 58                                                    | F   | 22                       | 18                     | 16                                 | 3.8          | BUC              | 16                                                   | (+)                    | (+) | (-) | (-) | (+) | Diff                     | I                       |

Abbreviations: BMI, body mass index; BUC, bucillamine; Cr, creatinine; Diff, diffuse; eGFR, estimated glomerular filtration rate; MN, membranous nephropathy; mPSL, methylprednisolone; PSL, prednisolone; RA, rheumatoid arthritis; Seg, segmental; UPCR, urine protein/creatinine ratio.
